# Supplementary material for: Adaptive Evolution of the Eda Gene and Scales Loss in Schizothoracine Fishes in Response to Uplift of the Tibetan Plateau
Source: MDPI journal article supplement (doi:10.3390/ijms19102953), 2018-09-27
Supplement: s1 [file s1]

**Table S2.** Sample and identification information pertaining to *Eda* sequences used in this study.

| Group            | Species                                      | Collecting Site      | Catchment            | Drainage System      | Number of Samples | Accession Number |
|------------------|----------------------------------------------|----------------------|----------------------|----------------------|-------------------|------------------|
| Barbinae         | <i>Barbodes opisthoptera</i>                 | Baoshan, Yunnan      | Nujiang River        | Nujiang River        | 2                 | KT239731         |
|                  | <i>Spinibarbus hollandi</i>                  | Lijiang, Guangxi     | Lijiang River        | Zhujiang River       | 2                 | KT239732         |
|                  | <i>Mystacoleucus lepturus</i>                | Xishuangbanna Yunnan | Lancang River        | Lancang River        | 2                 | KT239733         |
|                  | <i>Onychostoma lini</i>                      | Rong'an, Guangxi     | Zhujiang River       | Zhujiang River       | 2                 | KT239734         |
| Primitive groups | <i>Schizothorax eurystomus</i>               | Yecheng, Xinjiang    | Tizinafu River       | Tarim River          | 3                 | KT239706         |
|                  | <i>Schizothorax intermedius</i>              | Yecheng, Xinjiang    | Tizinafu River       | Tarim River          | 3                 | KT239707         |
|                  | <i>Schizothorax prenanti</i>                 | ABa, Sichuan         | Dadu River           | Yangtze River        | 3                 | KT239711         |
|                  | <i>Schizothorax scleracantha</i>             | Ganzi, Sichuan       | Jinsha River         | Yangtze River        | 2                 | KT239712         |
|                  | <i>Schizothorax pseudoaksaiensis</i>         | Xinyuan, Xinjiang    | Kunnes River         | Yili River           | 3                 | KT239708         |
|                  | <i>Schizothorax waltoni</i>                  | Lhasa, Tibet         | Lhasa River          | Yarlung Zangbo River | 3                 | KT239709         |
|                  | <i>Schizothorax plagiostomus</i>             | Gar, Tibet           | Gar River            | Indus River          | 2                 | KT239710         |
|                  | <i>Schizothorax molesworthi</i>              | Medog, Tibet         | Yarlung Zangbo River | Yarlung Zangbo River | 2                 | KT239715         |
|                  | <i>Schizothorax meridionalis</i>             | Tengchong, Yunnan    | Longchuan River      | Irrawaddy River      | 2                 | KT239716         |
|                  | <i>Schizothorax elongatus</i>                | Yingjiang, Yunnan    | Irrawaddy River      | Irrawaddy River      | 3                 | KT239717         |
|                  | <i>Schizothorax oconnori</i>                 | Lhasa, Tibet         | Lhasa River          | Yarlung Zangbo River | 3                 | KT239718         |
|                  | <i>Schizothorax wangchiachii</i>             | Shigu, Yunnan        | Jinsha River         | Yangtze River        | 3                 | KT239719         |
|                  | <i>Schizothorax dolichonema</i>              | Yushu, Qinghai       | Jinsha River         | Yangtze River        | 2                 | KT239720         |
|                  | <i>Schizothorax nukiangensis</i>             | Zuogong, Tibet       | Nujiang River        | Nujiang River        | 3                 | KT239721         |
|                  | <i>Schizothorax heterochilus</i>             | Ya'an Sichuan        | Qingyi River         | Yangtze River        | 3                 | KT239722         |
|                  | <i>Schizothorax lissolabiatus</i>            | Nangqian, Qinghai    | Zhaqu River          | Lancang River        | 3                 | KT239713         |
|                  | <i>Schizothorax biddulphi</i>                | Wuqia, Xinjiang      | Tarim River          | Tarim River          | 3                 | KT239723         |
|                  | <i>Schizothorax yunnanensis</i>              | Tengchong, Yunnan    | Lancang River        | Lancang River        | 2                 | KT239714         |
|                  | <i>Schizothorax yunnanensis paoshanensis</i> | Baoshan, Yunnan      | Baoshan east river   | Nujiang River        | 2                 | KT239724         |
|                  | <i>Schizothorax_gongshanensis</i>            | Gongshan, Yunnan     | Nujiang River        | Nujiang River        | 2                 | KT239725         |
|                  | <i>Schizothorax macropogon</i>               | Xigaze, Tibet        | Yarlung Zangbo River | Yarlung Zangbo River | 3                 | KT239726         |
|                  | <i>Schizothorax griseus</i>                  | Guiyang, Guizhou     | Wujiang River        | Yangtze River        | 2                 | KT239728         |
|                  | <i>Schizothorax davidi</i>                   | Wudu, Sichuan        | Jialing River        | Yangtze River        | 3                 | KT239727         |
|                  | <i>Schizothorax langtsangensis</i>           | Zadoi, Qinghai       | Zhaqu River          | Lancang River        | 2                 | KT239729         |
|                  | <i>Aspiorhynchus laticeps</i>                | Bazhou, Xinjiang     | Bosten Lake          | Tarim River          | 2                 | KT239730         |

|                           |                                              |                        |                      |                      |   |          |
|---------------------------|----------------------------------------------|------------------------|----------------------|----------------------|---|----------|
| Specialized groups        | <i>Gymnodiptychus dybowskii</i>              | Xinyuan, Xinjiang      | Kunnes River         | Yili River           | 3 | KT239704 |
|                           | <i>Diptychus maculatus</i>                   | Akeqi Xinjiang         | Akesu River          | Tarim River          | 3 | KT239705 |
|                           | <i>Ptychobarbus conirostris</i>              | Gar, Tibet             | Gar River            | Indus River          | 3 | KT239701 |
|                           | <i>Gymnodiptychus integrigymnatus</i>        | Tengchong, Yunnan      | Longchuan River      | Irrawaddy River      | 2 | KT239699 |
|                           | <i>Ptychobarbus dipogon</i>                  | Xigaze, Tibet          | Yarlung Zangbo River | Yarlung Zangbo River | 3 | KT239702 |
|                           | <i>Ptychobarbus kaznakovi</i>                | Yushu, Qinghai         | Jinsha River         | Yangtze River        | 3 | KT239700 |
|                           | <i>Gymnodiptychus pachycheilus</i>           | Jiuzhi, Qinghai        | Yellow River         | Yellow River         | 3 | KT239703 |
| Highly specialized groups | <i>Platypharodon extremus</i>                | Maduo, Qinghai         | Gyaring Lake         | Yellow River         | 3 | KT239680 |
|                           | <i>chuanchia labiosa</i>                     | Maduo, Qinghai         | Gyaring Lake         | Yellow River         | 3 | KT239681 |
|                           | <i>Herzensteinia microcephalus</i>           | Tanggula Shan, Qinghai | Tuotuo River         | Yangtze River        | 3 | KT239682 |
|                           | <i>Oxygymnocypris stewartii</i>              | Xigaze, Tibet          | Yarlung Zangbo       | Yarlung Zangbo River | 3 | KT239683 |
|                           | <i>Gymnocypris chui</i>                      | Lazi, Tibet            | Lange lake           | Indus River          | 3 | KT239684 |
|                           | <i>Gymnocypris namensis</i>                  | Lhasa, Tibet           | Namsto Lake          | Namsto Lake          | 3 | KT239691 |
|                           | <i>Gymnocypris eckloni</i>                   | Maduo, Qinghai         | Gyaring Lake         | Yellow River         | 3 | KT239685 |
|                           | <i>Gymnocypris przewalskii</i>               | Gonghe, Qinghai        | Qinghai Lake         | Qinghai Lake         | 3 | KT239686 |
|                           | <i>Gymnocypris przewalskii ganzihonensis</i> | Haiyan, Qinghai        | Ganzi River          | Qinghai Lake         | 3 | KT239687 |
|                           | <i>Gymnocypris waddellii</i>                 | Langkazi, Tibet        | Yamzho lake          | Yamzho lake          | 3 | KT239688 |
|                           | <i>Gymnocypris dobula</i>                    | Xigaze, Tibet          | Peiku lake           | Peiku lake           | 3 | KT239689 |
|                           | <i>Gymnocypris potanini</i>                  | Songpan, Sichuan       | Minjiang River       | Yangtze River        | 3 | KT239690 |
|                           | <i>Schizopygopsis kialingensis</i>           | Diebu, Gansu           | Bailong River        | Yangtze River        | 3 | KT239692 |
|                           | <i>Schizopygopsis younghusbandi</i>          | Lhasa, Tibet           | Yarlung Zangbo       | Yarlung Zangbo River | 3 | KT239693 |
|                           | <i>Schizopygopsis pylzovi</i>                | Haiyan, Qinghai        | Yellow River         | Yellow River         | 3 | KT239694 |
|                           | <i>Schizopygopsis stoliczkai</i>             | Ali, Tibet             | Shiquan              | Indus River          | 3 | KT239695 |
|                           | <i>Schizopygopsis malacanthus</i>            | Yushu, Qinghai         | Tongtian River       | Yangtze River        | 3 | KT239696 |
|                           | <i>Schizopygopsis kessleri</i>               | Dulan, Qinghai         | Dadu River           | Yangtze River        | 3 | KT239697 |
|                           | <i>Schizopygopsis thermalis</i>              | Naqu, Tibet            | Nujiang River        | Nujiang River        | 3 | KT239698 |
