# Supplementary material for: Adaptive Evolution of the Eda Gene and Scales Loss in Schizothoracine Fishes in Response to Uplift of the Tibetan Plateau
Source: MDPI journal article supplement (doi:10.3390/ijms19102953), 2018-09-27
Supplement: s1 [file s1]

**Table S1.** Sequences of the PCR primers for amplifying *Eda* gene.

| Eda Gene     | Oligonucleotides for PCR, 5' to 3' |                              | Annealing Temperature | Amplicon Size, bp |
|--------------|------------------------------------|------------------------------|-----------------------|-------------------|
| cDNA         | F: AAGTCGCTGAGAGGACGAGGAAGTT       | R: CGACCCTATCAGACACACATCACG  | 58 °C                 | 1103-1127         |
| Exon 1       | F: AAGTCGCTGAGAGGACGAGGAAGTT       | R: GGACACCGACCACCCAACAATAGA  | 67 °C                 | 351               |
| Exon 2       | F: GAGCAGATGGAGGGATGAACA           | R: ATTATTGGGCTATGTTGTGCG     | 58 °C                 | 327               |
| Exon 3 and 4 | F: GTCATTATCGGTTTGGCTAC            | R: AAACCTCTCCCTTCAGCAA       | 52 °C                 | 670-700           |
| Exon 5and 6  | F: GCAAAAACATTTCTCTTCTCTGACA       | R: ACTGGCTGTTGTAAATGTTCTTTGT | 60 °C                 | 850-880           |
| Exon 7 and 8 | F: TCACTGTGTTTAACTGTGCCGCTG        | R: CGACCCTATCAGACACACATCACG  | 68 °C                 | 649-669           |
| Target site  | F: TTGTTTTGCTTCTCATCAGTTG          | R: TTTGCTCTGCTGCTTCACTC      | 58 °C                 | 357               |
