# Supplementary material for: Adaptive Evolution of the Eda Gene and Scales Loss in Schizothoracine Fishes in Response to Uplift of the Tibetan Plateau
Source: MDPI journal article supplement (doi:10.3390/ijms19102953), 2018-09-27
Supplement: s1 [file s1]

|                              |   |                                                                                                                              |
|------------------------------|---|------------------------------------------------------------------------------------------------------------------------------|
| HSG(Gymnocypris przewalskii) | 1 | MTDLHATMPKR EP AKLEER[5] AC- EC QNQNN-- CN -- I FLSLFI LSLSL HLVTLCYLDLSELKRE - I XQNK----- [1] EVsSTGPVPhyEA                |
| SG(Ptychobarbus dipogon)     | 1 | MTDLHATMPKR EP AKLEER[5] AC- EC QNQNN-- CN -- I FLSLFI LSLSL HLVTLCYLDLSELKRE - I SQNK----- [1] EVsSTXPVPhyEA                |
| SG(Diptychus maculatus)      | 1 | MTDLHAAMPKR EP AKLEER[5] AC- EC QNQNN-- CN -- I FLSLFI LSLSL HLVTLCYLDLSELKRE - I SQNK----- [1] EVsSTGPVPhyEA                |
| PG(Schizothorax prenanti)    | 1 | MTDLHAAMPKR EP AKLEER[5] AC- EC QSQNN-- CX -- I FLSLFI LSLSL HLVTLCYLDLSELKRE - I SQNK----- [1] EVsSTGPVPhyEA                |
| Spinibarbus hollandi         | 1 | MTDLHAAMPKR EP AKLEER[5] AC- EC QSQNN-- CX -- I FLSLFI LSLSL HLVTLCYLDLSELKRE - I SQNK----- [1] EVsSXGPVPhyEA                |
| stickleback                  | 1 | MTRDGS P- AEDFA CK VM--- L PC- TC NKKCRS - RS G SV VFLGLFLLSLSL HAVTLVCYLDLSEVKRE - I I HQKR DTMITFAG DP- ADPA--- AV         |
| medaka                       | 1 | MACDGS S- AEDFP DK VAFRAT PC- TC G ECKRG- QS- [1] SMVFLGFFLLSLCL HAVTLVCYLDLSEVKRE kVLHQRR ESMVTLTVS D--- PV--- GV           |
| Danio rerio                  | 1 | MI DL HAAMEPKR EP AKLEER[5] AC- EC QSQNN-- CK -- I FLSLFI LSLSL HLVTLCYLDLSELKRE - I SQNK----- [1] EVsSTGPVPhyEA             |
| Scleropages formosus         | 1 | MASKGL S ENFAH/ EH KVLQCS [7] GC- MC R KQCSS - CR -- VFLGFFVL LSLSL HLVTLCYLDLSEVKRE - I AQNR EEPVWPA[4] E PI SPGAELRF V     |
| Clupea harengus              | 1 | MACES L V----- DK F MESAS [6] PC- TC K KRCNN-- CN -- VFLGFFI LSLAL HFI TSCFDLRLSEVKRE - I ALKKR EPASAVGCS [5] YH- TDDSEED--- |
| Stegastes partitus           | 1 | MACDGS S- AEDFP DK VMPGAA PC- TC S KRCRS - RS [6] SV VFLGLFLLSLSL HAVTLVCYLDLSEVKRE - I I HQKR DSMPLSGS DL- ADPVAa AV        |
| Kryptolebias marmoratus      | 1 | MACDGS S PAEDFP DK L MPRGA PC- MC N KRCRA S R S T SL VFLGLFLLSLSL HAVTLVCYLDLSEVKRE - I I HQKR DSVATLTGR E- ADPA--- AV       |
| Cyprinodon variegatus        | 1 | MACDDAS PAEDFP DT L MPRGA PC- MC G KRCRG- RS G SA VFLGLFLLSLTL HAVTL CYLDLSEVKRE - I THQKR ESI VTTSGV DL- AEPM--- GV         |
| Nothobranchius furzeri       | 1 | MACDG- S PAEDFS DK L MPRAA PC- MC N KRCRG- RS T SL VFLGLFLLSLTL HAVTLVCYLDLSEVKRE - I I HQKR DSMGLSGR DLI ADPA--- AV         |
| Xiphophorus maculatus        | 1 | MACDDAS PAEDFP DT VMPRGA PC- MC G KRCRG- RS G SA VFLGLFLLSLTL HAVTLVCYLDLSEVKRE - I THQKR DSKVTHAGV DL- DDPV--- GV           |
| Oryzias latipes              | 1 | MACDGS S- AEDFP DK VAFRAT PC- TC G ECKRG- QS- [1] SMVFLGFFLLSLCL HAVTLVCYLDLSEVKRE kVLHQRR ESMVTLTVS D--- PV--- GV           |
| Oreochromis niloticus        | 1 | MARDGS S- AEDFP DK VMPI AA PC- TC S KRCRS - RS- [1] SMVFLGLFLLSLTL HAVTLVCYLDLRSQKRE - I I HQKR DSMVTLACS DL- ADP--- AE      |

|                              |     |                                                                                                                        |
|------------------------------|-----|------------------------------------------------------------------------------------------------------------------------|
| HSG(Gymnocypris przewalskii) | 89  | T--APVLR-LPD T-DHP T--- I BDQ----- X RWR DEH [4] ERV I HXTKRS ----- ETNGK - RK GDRKKGKGP--- PGAPGPPGPGQPPG PG PG P     |
| SG(Ptychobarbus dipogon)     | 89  | T--APVLR-LPD T-DHP T--- I BDQ----- X RWR DEH [4] ERV I HRTXRS ----- ETNGK - RK GDRKKGKGP--- PGAPGPPGPGQPPG PG PG P     |
| SG(Diptychus maculatus)      | 89  | T--APVLR-LPD T-DHP T--- I BDQ----- S RWR DEH [4] ERV I HRTKRS ----- ETNGK - RK GDRKKGKGP--- PGTPGPPGPGQPPG PG PG P     |
| PG(Schizothorax prenanti)    | 89  | T--APVLR-LPD T-DHP T--- I DDQ----- S RWR DEH [4] ERV I HRTKRS ----- ETNGK - KK ADRKKGKGP--- PGAPGPPGPGQPPG PG PG P     |
| Spinibarbus hollandi         | 89  | T--APVLR-LPD T-DHP T--- I X DQ----- S RWR DEH [4] ERV I HRTKRS ----- ETNGK - KK GERKKGKGP--- PGAPGPPGPGQPPG PG PG P    |
| stickleback                  | 86  | L--APGQP-RPD SgVGR G GEG HE EK LLRNDEL HAT QDN RG TQRAKRS PGKQPET ELTGR E RR KKKKKGKRP V-- PGPPGPPGPGQPPG PG PG P      |
| medaka                       | 93  | L--pPGGYQ-RQD---SR S GENR QER LQYRNDGF RST EDH RDI TQRVKRS SS KETEI ESTGK E KR KDKKKGKRI V-- PGPPGPPGPGQPPG PG PG P    |
| Danio rerio                  | 89  | T--EPVLQ-SPD T-DHP T--- I GDQ----- S RWR DEH [4] DRV I HRTKRS ----- ETNGK - KK GERKKGKGP--- PGAPGPPGPGQPPG PG PG P     |
| Scleropages formosus         | 103 | V--EPSRR-TPE PqDRP S LQS I DDK-----T DLK DDS ERV I HRAKRS RT KPES ESNGK - KK - EKKKKGKQ--- PGAPGPPGPGQPPG PG PG P      |
| Clupea harengus              | 93  | I---PPEP-SPP E---- T PEG I S ER RVQ/TGS GST --- LWRTKRG TNRRHS ESSSG K RK DKKKGKRR ga PGPPGPPGPGQPPG PG PG P           |
| Stegastes partitus           | 95  | L-I SPGHP-RPD PgSSR S ADP QE EK LLHRKSDF HAT EDN RG TQRAKRS PGKQPET ESTGK E KR KDRKKGKRS V-- PGPPGPPGPGQPPG PG PG P    |
| Kryptolebias marmoratus      | 87  | LI aPGHP-RAD PqRSR G GEA HE ER LLYRNDGF HAT QDN RGR TR RAKRS PGKEPET ESNGK E KR KKKKKGKRP V-- PGPPGPPGPGQPPG PG PG P   |
| Cyprinodon variegatus        | 84  | L--PPGHP-QE P--RR T EED R E ER SAFRKEG HAT KDS RGR TR RAKRS PGKQPET ESNGK E KR KDKKKGKRP M-- PGPPGPPGPGQPPG PG PG P    |
| Nothobranchius furzeri       | 86  | L-sPGHP-RVD SgRSR G GEG HE ER LLYRNDGF HGT QJK RGR PQRAKRS PGREPET ESNGK E KR KDKKKGKRP V-- PGPPGPPGPGQPPG PG PG P     |
| Xiphophorus maculatus        | 84  | L--PPGHP-RMD TgSRH S EED R E ER FLYRNDGF HGT KDS RGR TR RAKRS PGRETET ESNGK E KR KKKKKGKRP --- GPPLGPPGPGQPPG PG PG P  |
| Oryzias latipes              | 93  | L--pPGGYQ-RQD---SR S GENR QER LQYRNDGF RST EDH RDI TQRVKRS SS KETEI ESTGK E KR KDKKKGKRI V-- PGPPGPPGPGQPPG PG PG P    |
| Oreochromis niloticus        | 85  | V-I SLGHP v RLD SgSSR G GES R E EK LLYRKADF HGT EDN RG TQRAKRS PGKEPET ESTGK E KR KEKKRAGRP V-- PGPPGPPGPGQPPG PG PG P |

|                              |     |                                       |                                                                                   |                        |
|------------------------------|-----|---------------------------------------|-----------------------------------------------------------------------------------|------------------------|
|                              |     | <b>Indel</b>                          |                                                                                   | <b>19 (GXY) repeat</b> |
| HSG(Gymnocypris przewalskii) | 170 | GNNAMPSGPPGP P [6] Q3PGS G-----G      | KHRET-PPAWHLQ3QETTI Q/KEDLSEGMLKNWIM SI H Q RV Y KMSR X GELEVLDDGYFI YSQ/VEVYLN   |                        |
| SG(Ptychobarbus dipogon)     | 170 | GNNAMPSGPPGP X P [6] Q3PGP G-----G    | KHRET-QPAWHLQ3QETTI Q/KEDLSEGMLKNWIM SI H Q RV F KMSR S GELEVLDDGYFI YSQ/VEVYLN   |                        |
| SG(Diptychus maculatus)      | 170 | GNNAMPSGPPGP P [6] Q3PGP G-----D IG   | KHRET-QPAWHLQ3QETTI Q/KEDLSEGMLKNWIM SI H Q RV F KMSR S GELEVLDDGYFI YSQ/VEVYLN   |                        |
| PG(Schizothorax prenanti)    | 170 | GNNAMPSGPPGP P [6] Q3PGP PQ3PS GGAEGK | KHRET-QPAWHLQ3QETTI Q/KEDLSEGMLKNWIM SI H Q RV F KMSR S GELEVLDDGYFI YSQ/VEVYLN   |                        |
| Spinibarbus hollandi         | 170 | GNNAMPSGPPGP P [6] Q3PGP PQ3PS GGAEGK | NHRET-QPAWHLQ3QETPI Q/KEDLSEGMLKNWIM SI H X RV X KMSR X GELEVLDDGYFI YSQ/VEVYLN   |                        |
| stickleback                  | 183 | GNNVGPAGPPGP P Q3PPG TP3PA GVPDKT     | KTKEF-QPAWHLQ3QETTI Q/REDLSQGLRNKMWI SI H HRV F KMSR S GELEVLDDGYFI YSQ/VEVYLN    |                        |
| medaka                       | 182 | GNNVGPAGPPGP P Q3PPG SQ3PA GVSCKT     | KTKEF-QPAWHLQ3QETTI Q/REDLSQGLRNKMWI SI H HRV F KMSR T GQLEVLDDGYFI YSQ/VEVYLN    |                        |
| Danio rerio                  | 170 | GNNAMPSGPPGP P [6] Q3PPG PQ3PS GG-EKG | KHREA-QPAWHLQ3QETTI Q/KEDLSEGMLKNWIM SI H Q RV F KMSR S GELEVLDDGYFI YSQ/VEVYLN   |                        |
| Scleropages formosus         | 190 | GNNAMPSGPPGP P [6] Q3PPG PQ3PA G3MDKT | RGREI-QPAWHLQ3QETTI Q/KEDLSEGMLKNWIM SI H H KV F KMSR S GELEVLDDGYFI YSQ/VEVYLN   |                        |
| Clupea harengus              | 181 | GNNVGPAGPPGP P K3PPG PQ3PA GAVDKS     | KI KEF-QPAWHLQ3QETTI Q/REDLSQGLRNKMWI SI SVH HKV F KMSR S GELEVLDDGYFI YSQ/VEVYLN |                        |
| Stegastes partitus           | 197 | GNNVGPAGPPGP P Q3PPG AQ3PA GVADRT     | KTKEF-QPAWHLQ3QETTI Q/REDLSQGLRNKMWI SI H HRV F KMSR T GQLEVLDDGYFI YSQ/VEVYLN    |                        |
| Kryptolebias marmoratus      | 191 | GNNVGPAGPPGP P Q3PPG AQ3PA GVPD--     | IKTNF-QPAWHLQ3QETTI Q/REDLSQGLRNKMWI SI N K DV F RMNPR T GELVLLDDGYFI YSQ/VEVYLN  |                        |
| Cyprinodon variegatus        | 185 | GNNVGPAGPPGP P Q3PPG AQ3PA GVPD--     | ISKRF-QPAWHLQ3QETTI Q/REDLSQGLRNKMWI SI N K DV F RMNPR T GELVLLDDGYFI YSQ/VEVYLN  |                        |
| Nothobranchius furzeri       | 188 | GNNVGPAGPPGP P Q3PPG TQ3PA GVPD--     | KTKEF-QPAWHLQ3QETTI Q/REDLSQGLRNKMWI SI N K DV F RMNPR T GELVLLDDGYFI YSQ/VEVYLN  |                        |
| Xiphophorus maculatus        | 185 | GNNVGPAGPPGP P Q3PPG PQ3PA GVS-D      | ISKKF-QPAWHLQ3QETTI Q/REDLSQGLRNKMWI SI N K DV F RMNPR T GELVLLDDGYFI YSQ/VEVYLN  |                        |
| Oryzias latipes              | 182 | GNNVGPAGPPGP P Q3PPG SQ3PA GVSCKT     | KTKEF-QPAWHLQ3QETTI Q/REDLSQGLRNKMWI SI H HRV F KMSR T GQLEVLDDGYFI YSQ/VEVYLN    |                        |
| Oreochromis niloticus        | 187 | GNNVGPAGPPGP P Q3PPG AQ3PA GVPCKG     | KTKEF-QPAWHLQ3QETTI Q/REDLSQGLRNKMWI SI H HRV F KMSR T GQLEVLDDGYFI YSQ/VEVYLN    |                        |

|                              |     |                                                                                                          |
|------------------------------|-----|----------------------------------------------------------------------------------------------------------|
| HSG(Gymnocypris przewalskii) | 273 | TDI ASYEVMDKTPFLRCTRSI ETGQRKFNTCY T AGVCL LRA R QRI SI RMWYEDT S I S M S N H T T FLGCI RLQDAPAA GH T-   |
| SG(Ptychobarbus dipogon)     | 273 | TDI ASYEVMDKTPFLRCTRSI ETGQRKFNTCY T AGVCL LRA X QRI SI RMWYEDT X I S M S N H T X FLGS I RLQDAPAA X H T- |
| SG(Diptychus maculatus)      | 275 | TDI ASYEI MDKTPFLRCTRSI ETGQRKFNTCY T AGVCL LRA R QRI SI RMWYEDT S I S M S N H T T FLGX I RLQDAPAA GH T- |
| PG(Schizothorax prenanti)    | 281 | TDI ASYEVMDKTPFLRCTRSI ETGQRKFNTCY T AGVCL LRA R QRI SI RMWYEDT S I S M S N H T T FLGS I RLQDAPAA GH T-  |
| Spinibarbus hollandi         | 281 | TDI ASYEVMDKTPFLRCTRSI ETGQRKFNTCY X AGVCL LRA R QRI SI RMWYEDT S I S M S N H T T FLGX I RLQDAPAA GH X-  |
| stickleback                  | 288 | TDI ASYEVMDSNPFLRCTSI ETGQRKFNTCY T AGV S L LRA G QKI SI RI AHEYT L I NVTN H T T FLGS VRLGEAPSA GQN-     |
| medaka                       | 287 | TDI ASYDMMDSPFLRCTSI ETGQRKFNTCY T AGV S P LRA G QKI SI RI AHEYT L I NVTN H T T FLGS VRLGEAPSA G---      |
| Danio rerio                  | 280 | TDI ASYEVMDKTPFLRCTRSI ETGQRKFNTCY T AGVCL LRA R QRI SI RMWYEDT S I S M S N H T T FLGS I RLQDAPSA GH T-  |
| Scleropages formosus         | 302 | TDI ASYEVMDKTPFLRCTRSI ETGQRKFNTCY T AGVCL LRA R QRI SI KMWYEDT S I S M T N H T T FLGS I RLGEAPPA GH S-  |
| Clupea harengus              | 286 | TDI ASYEVLDRTPLFRLCTSI ETGQRKFNTCY T AGV S L LRA R QRI SI RMWYEDT L I S M T D H T T FLGS VRLGQ PPA GQA-  |
| Stegastes partitus           | 302 | TDI ASYDMMDSNPFLRCTSI ETGQRKFNTCY T AGV S P LRA G QKI SI RI AHEYT L I NVTN H T T FLGS VRLGEAPSA GQNg     |
| Kryptolebias marmoratus      | 294 | TDI ASYDMMDSPFLRCTSI ETGQRKFNTCY T AGV S L LRS G QKI SI RI AHEYT L I NVTN H T T FLGS VRLGEAPSA GQNg      |
| Cyprinodon variegatus        | 288 | TDI ASYDMMDSPFLRCTSI ETGQRKFNTCY T AGV S Q LRS G QKI SI RI AHEYT L I NVTN H T T FLGS VRLGEAPSA GQNg      |
| Nothobranchius furzeri       | 291 | TDI ASYDMMDSNPFLRCTSI ETGQRKFNTCY T AGV S L LRS G QKI SI RI AHEYT L I NVTN H T T FLGS VRLGEAPSA GQNg     |
| Xiphophorus maculatus        | 288 | TDI ASYDMMDSPFLRCTSI ETGQRKFNTCY T AGV S L LRS G QKI SI RI AHEYT L I NVTN H T T FLGS VRLGEAPSA GQNg      |
| Oryzias latipes              | 287 | TDI ASYDMMDSPFLRCTSI ETGQRKFNTCY T AGV S P LRA G QKI SI RI AHEYT L I NVTN H T T FLGS VRLGEAPSA G---      |
| Oreochromis niloticus        | 292 | TDI ASYDMMDSPFLRCTSI ETGQRKFNTCY T AGV S P LRA G QKI Y I RI AHEYT L I NVTN H T T LGS VRLGEAPSA GQNg      |
